# Supplementary material for: A single nucleotide polymorphism in ADIPOQ predicts biochemical recurrence after radical prostatectomy in localized prostate cancer
Source: PubMed Central journal article supplement (PMC4741670; doi:10.18632/oncotarget.4980), 2015-07-22
Supplement: oncotarget-06-32205-s001.pdf [file oncotarget-06-32205-s001.pdf]

## A single nucleotide polymorphism in *ADIPOQ* predicts biochemical recurrence after radical prostatectomy in localized prostate cancer

### Supplementary Material

**Supplementary Table 1.** Anthropometric measurements of the study populations

| Variables            | BCR (N = 53)       | Non-BCR (N = 155)  | <i>P</i> <sup>a</sup> |
|----------------------|--------------------|--------------------|-----------------------|
| VAT, mm <sup>2</sup> | 17453 (4208-34855) | 12010 (4107-34235) | 0.001                 |
| SAT, mm <sup>2</sup> | 9564 (3580-31578)  | 11579 (2238-32955) | 0.617                 |
| PPF, mm <sup>2</sup> | 2737 (1625-4799)   | 2987 (1798-5340)   | 0.031                 |

<sup>a</sup>*P* value for Mann-Whitney's U-test.

**Supplementary Table 2.** Associations of SNPs with adiponectin level.

| <b>SNP</b> | <b>SAT</b> |          | <b>PPF</b> |          | <b>VAT</b> |          | <b>BMI</b> |          |
|------------|------------|----------|------------|----------|------------|----------|------------|----------|
|            | $\beta$    | <i>P</i> | $\beta$    | <i>P</i> | $\beta$    | <i>P</i> | $\beta$    | <i>P</i> |
| rs182052   | -0.010     | 0.875    | -0.018     | 0.089    | -0.033     | 0.212    | -0.027     | 0.598    |
| rs266729   | 0.060      | 0.440    | 0.007      | 0.588    | 0.015      | 0.644    | 0.111      | 0.068    |
| rs3774262  | 0.005      | 0.95     | 0.001      | 0.911    | 0.044      | 0.184    | 0.057      | 0.364    |

<sup>a</sup> Adjusting for age, BMI and statins use.
